# Supplementary material
Source: PubMed Central journal article supplement (PMC156040)
Supplement: nar_31_10_2534__1.pdf [file nar_31_10_2534__1.pdf]

**Supplementary Material for the Manuscript: Large-scale cloning and analysis of genes preferentially expressed in elongating cotton fibers, Ji et al.**

**Summary of cDNA Array Data from Differential Screen and Expression Pattern of the Cotton Fiber Development-Related ESTs**

This table summarizes the cDNA array comparison between 10 dpa upland cotton fiber and 10 dpa *fl* mutant ovule, and the expression pattern analysis during early cotton fiber development (0, 5, 10, 20 dpa). A clone is included in this list if its expression ratio of wild-type to mutant greater than 2. For each cDNA, a Clone ID is given, which can be used to retrieve the nucleotide sequence and other information at <http://cottonfiber.cbi.pku.edu.cn>.

| Clone No.                             | Annotation                            | Ratio <sup>a</sup> | Relative expression level <sup>b</sup> |      |       |       |
|---------------------------------------|---------------------------------------|--------------------|----------------------------------------|------|-------|-------|
|                                       |                                       |                    | 0dpa                                   | 5dpa | 10dpa | 20dpa |
| Type I Highly expressed around 5 dpa  |                                       |                    |                                        |      |       |       |
| P2B03                                 | tRNA-Ile gene                         | 4.2                | 0.04                                   | 12   | 12    | 0     |
| P2E06                                 | Lipid transfer protein 11             | 3                  | 0.21                                   | 9    | 7.5   | 6.9   |
| P2F07                                 | Acyltransferase homolog               | 16                 | 0.36                                   | 6.8  | 4.8   | 1.4   |
| P2G03                                 | Plasma-membrane H <sup>+</sup> ATPase | 2.3                | 0.01                                   | 2    | 0.5   | 0     |
| P2H05                                 | Sodium channel $\alpha$ -subunit      | 6.1                | 1.94                                   | 1.5  | 1.1   | -2.3  |
| P2H09                                 | Endo-1,4- $\beta$ -mannosidase        | 29                 | 0.05                                   | 4    | 0.4   | 0     |
| P2H10                                 | Enolase                               | 2.6                | 0.09                                   | 1.2  | -1.1  | -1.8  |
| P3B05                                 | Cinnamyl-alcohol dehydrogenase        | 5.6                | 0.04                                   | 10   | 9.8   | 5.5   |
| P3G12                                 | Unknown                               | 7.3                | 0.05                                   | 1    | -1    | -1.5  |
| P3H08                                 | Unknown                               | 97                 | 0.04                                   | 0.5  | -0.7  | -1    |
| Type II Highly expressed around 10dpa |                                       |                    |                                        |      |       |       |
| P1A09                                 | Unknown                               | 3.6                | 0                                      | 0    | 0.5   | -10   |
| P1B01                                 | Proline-rich protein 1                | 160                | 0.6                                    | 7.4  | 35    | 20    |
| P1B02                                 | Proline-rich protein 2                | 100                | 0.56                                   | 7.6  | 32    | 19    |
| P1B03                                 | Proline-rich protein 3                | 116                | 0.68                                   | 8.1  | 32    | 19    |
| P1B04                                 | Proline-rich protein 4                | 2                  | 0.09                                   | 55   | 240   | 149   |
| P1B06                                 | Proline-rich protein 5                | 32                 | 0.05                                   | 94   | 256   | 92    |
| P1B08                                 | Proline-rich protein 6                | 190                | 0.93                                   | 5.9  | 22    | 13    |
| P1B10                                 | Arabinogalactan protein 2             | 30                 | 0.03                                   | 43   | 400   | 347   |
| P1B11                                 | Arabinogalactan protein 3             | 12                 | 0.06                                   | 34   | 203   | 195   |
| P1B12                                 | Arabinogalactan protein 4             | 14                 | 0.03                                   | 70   | 423   | 380   |
| P1C01                                 | Arabinogalactan protein 5             | 21                 | 0.09                                   | 26   | 178   | 121   |
| P1C05                                 | Proline-rich extensin                 | 3.4                | 0.22                                   | 4.4  | 13    | 10    |
| P1C06                                 | Unknown                               | 3.7                | 0.27                                   | 3.3  | 7.8   | 3.3   |
| P1C08                                 | Expansin 1                            | 51                 | 0                                      | 0    | 0.1   | -2    |
| P1C10                                 | Expansin 3                            | 13                 | 1.08                                   | 5.4  | 20    | 12    |
| P1C11                                 | Expansin 4                            | 11                 | 1.02                                   | 5.7  | 22    | 13    |
| P1C12                                 | Expansin 5                            | 5.2                | 0.1                                    | 29   | 120   | 75    |
| P1D01                                 | Xyloglucan endotransglycosylase       | 3.2                | 0.15                                   | 20   | 99    | 73    |
| P1F01                                 | Auxin binding protein                 | 8.5                | 0.32                                   | 13   | 59    | 25    |
| P1F02                                 | Annexin                               | 2.3                | 1.41                                   | 3.9  | 11    | 8.8   |
| P1F07                                 | P-glycoprotein                        | 2.8                | 0.21                                   | 1.9  | 2.4   | 0.3   |
| P1D05                                 | $\alpha$ -tubulin 2                   | 4.4                | 1.55                                   | 3.2  | 13    | 8.7   |

|       |                                            |     |      |      |     |      |
|-------|--------------------------------------------|-----|------|------|-----|------|
| P1D08 | $\alpha$ -tubulin 4                        | 2.6 | 0.02 | 0    | 13  | 7.5  |
| P1D11 | $\beta$ -tubulin 7                         | 7   | 0.01 | 3    | 20  | 34   |
| P1F04 | Histone H2B1                               | 10  | 3.13 | 1.7  | 3.6 | 2.8  |
| P1F11 | Phosphoserine aminotransferase             | 2.9 | 0.27 | 5.1  | 9.9 | 8.7  |
| P1F12 | Serine/glycine hydroxymethyltransferase    | 2.2 | 0.08 | 2.1  | 11  | 5.8  |
| P1G01 | $\beta$ -alanine-pyruvate aminotransferase | 7.8 | 0.09 | 2.3  | 5.1 | 0.6  |
| P1G05 | Homeodomain protein                        | 4.2 | 2.07 | 1.9  | 5.8 | 5.4  |
| P1H05 | DNA-binding cnd41-like protein 1           | 5.4 | 0.02 | 10   | 29  | 26   |
| P1H06 | DNA-binding cnd41-like protein 2           | 9.4 | 0.46 | 12   | 45  | 21   |
| P1H07 | Putative chloroplast DNA-binding protein   | 15  | 0.02 | 17   | 42  | 33   |
| P1H10 | Unknown                                    | 5.3 | 0.08 | 17   | 253 | 144  |
| P1H12 | Unknown                                    | 2.3 | 0.66 | 4.5  | 23  | 18   |
| P2A03 | Ribosomal protein small subunit 4e         | 3   | 0.82 | 1    | 3   | 1.6  |
| P2A06 | Ribosomal protein S18                      | 32  | 0.95 | 5.9  | 22  | 14   |
| P2A10 | 60S ribosomal protein L21                  | 2.8 | 1.26 | 2.1  | 4.9 | 3.9  |
| P2B05 | Unknown                                    | 3.2 | 3.33 | 1.6  | 3.5 | 2.6  |
| P2B06 | Unknown                                    | 5.6 | 0.03 | 7.7  | 22  | 18   |
| P2B10 | Subtilisin-like proteinase                 | 8   | 0    | 0.02 | 18  | 3.5  |
| P2B11 | Unknown                                    | 18  | 0.11 | 18   | 50  | 19   |
| P2B12 | Putative serine proteinase                 | 2.5 | 1.74 | 2.6  | 11  | 5.7  |
| P2C02 | 70 kDa heat shock protein 1                | 2   | 0.13 | 2.1  | 15  | 6.2  |
| P2C03 | 70 kDa heat shock protein 2                | 2.8 | 0.02 | 1    | 5.5 | 0    |
| P2C04 | 70 kDa heat shock protein 3                | 4.7 | 0.03 | 129  | 160 | 91   |
| P2C05 | 15kDa heat shock protein                   | 5   | 0.05 | 10   | 15  | 9.4  |
| P2C07 | 18 kDa class I heat shock protein          | 4.3 | 0.07 | 18   | 33  | 26   |
| P2C09 | Cyclophilin                                | 2.2 | 0.17 | 4.6  | 5.5 | 4.8  |
| P2C10 | 26S proteasome AAA-ATPase subunit          | 172 | 0.03 | 28   | 106 | 84   |
| P2D04 | Putative importin                          | 3.3 | 0.02 | 128  | 186 | 98   |
| P2D05 | Putative peptide transporter PTR2-B        | 3.3 | 0.03 | 8.3  | 43  | 25   |
| P2D06 | Lipid transfer protein 1                   | 93  | 0.75 | 7.6  | 27  | 18   |
| P2D07 | Lipid transfer protein 2                   | 57  | 1.02 | 5.5  | 22  | 13   |
| P2D08 | Lipid transfer protein 3                   | 34  | 1.16 | 5    | 19  | 12   |
| P2D09 | Lipid transfer protein 4                   | 45  | 1.53 | 3.7  | 14  | 8.9  |
| P2D10 | Lipid transfer protein 5                   | 25  | 1.38 | 4.1  | 16  | 9.8  |
| P2D12 | Lipid transfer protein 6                   | 37  | 0.28 | 12   | 80  | 48   |
| P2E01 | Lipid transfer protein 7                   | 33  | 0.13 | 6.5  | 21  | 7.2  |
| P2E02 | Lipid transfer protein 8                   | 2.7 | 0.39 | 12   | 30  | 22   |
| P2E03 | Lipid transfer protein 9                   | 37  | 0.05 | 5.6  | 26  | 14   |
| P2E05 | Lipid transfer protein 12                  | 24  | 1.5  | 3.9  | 15  | 9.1  |
| P2E07 | $\beta$ -ketoacyl CoA synthase 1           | 39  | 0.04 | 12   | 75  | 59   |
| P2E08 | $\beta$ -ketoacyl CoA synthase 2           | 45  | 0    | 0.2  | 5   | 5    |
| P2E09 | $\beta$ -ketoacyl CoA synthase 3           | 24  | 0    | 0.2  | 7   | 6.1  |
| P2E11 | $\beta$ -ketoacyl CoA synthase 4           | 31  | 0.04 | 11   | 89  | 51   |
| P2F01 | VLCFA condensing enzyme                    | 39  | 0.12 | 1.7  | 5.8 | 0.8  |
| P2F03 | LCFA <sup>c</sup> elongation enzyme 1      | 91  | 0.02 | 66   | 175 | 57   |
| P2F04 | LCFA elongation enzyme 2                   | 47  | 0    | 2    | 1.4 | -1.5 |
| P2F05 | Putative fatty acid elongase               | 3.3 | 0.15 | 7.4  | 13  | 11   |

|       |                                           |     |      |     |     |     |
|-------|-------------------------------------------|-----|------|-----|-----|-----|
| P2F02 | Arabidopsis FIDDLEHEAD homology           | 74  | 0.05 | 16  | 57  | 24  |
| P2E12 | Alu I-fragment-like protein               | 5.8 | 0.3  | 4.3 | 56  | 23  |
| P2F11 | Aquaporin                                 | 2.2 | 1.94 | 3   | 12  | 7   |
| P2G01 | V-ATPase catalytic subunit                | 146 | 0.01 | 97  | 996 | 746 |
| P2G02 | Vacuolar H <sup>+</sup> -ATPase subunit E | 2.4 | 0.83 | 4.8 | 11  | 9.6 |
| P2G07 | Unknown                                   | 35  | 0.05 | 19  | 81  | 80  |
| P2G08 | Putative ABC transporter                  | 3.4 | 0.18 | 13  | 52  | 25  |
| P2G12 | Unknown                                   | 3.3 | 0    | 0.1 | 7.3 | 5.9 |
| P1A03 | Acid invertase                            | 16  | 0    | 0   | 0.5 | 2   |
| P2H11 | Fructose-bisphosphate aldolase            | 71  | 0.06 | 14  | 19  | 13  |
| P3A03 | Quinone oxidoreductase                    | 7.5 | 0.25 | 6.1 | 24  | 17  |
| P3A05 | Cytochrome P450-like protein 1            | 14  | 0.03 | 94  | 280 | 177 |
| P3A07 | Cytochrome P450-like protein 2            | 2.9 | 0.09 | 32  | 99  | 62  |
| P3A08 | Cytochrome-c oxidase chain III            | 2.5 | 0.03 | 0.7 | 4.3 | 0   |
| P3B01 | NADH:ubiquinone oxidoreductase            | 2.2 | 0.41 | 3.3 | 11  | 6.7 |
| P3B02 | Unknown                                   | 40  | 0.23 | 19  | 93  | 53  |
| P3B03 | Unknown                                   | 12  | 0.36 | 8.3 | 24  | 11  |
| P3B04 | Putative oxidoreductase                   | 22  | 0.2  | 7.6 | 34  | 14  |
| P3B06 | Aldehyde dehydrogenase                    | 4.2 | 0.08 | 2.5 | 4   | 2.3 |
| P3B08 | PDI-like protein                          | 2.6 | 0.08 | 1.3 | 6.9 | 3.6 |
| P3C03 | Cycloartenol synthase                     | 4   | 0.77 | 5.2 | 26  | 17  |
| P3C04 | Anthocyanidin synthase                    | 2.3 | 0.95 | 2.1 | 2.1 | 1.3 |
| P3C06 | Putative calmodulin                       | 2   | 0.36 | 2.6 | 7.1 | 4.4 |
| P3C08 | Unknown                                   | 14  | 0.51 | 8.7 | 39  | 26  |
| P3C09 | Unknown                                   | 10  | 1.5  | 2.8 | 13  | 8.9 |
| P3C12 | Leucine-rich repeat protein kinase        | 3.3 | 0.56 | 2.6 | 11  | 5.3 |
| P3D03 | MAP kinase-like protein                   | 53  | 0.51 | 10  | 51  | 25  |
| P3D04 | Unknown                                   | 3.9 | 0.24 | 1.5 | 5.5 | 4.5 |
| P3D06 | Unknown                                   | 2.4 | 0.4  | 7.3 | 23  | 21  |
| P3D07 | Unknown                                   | 10  | 0.16 | 2.7 | 12  | 6.3 |
| P3D10 | Peroxidase                                | 20  | 0.03 | 4   | 26  | 12  |
| P3D11 | Dehydration-induced protein RD22-like     | 20  | 1.15 | 4.9 | 19  | 11  |
| P3E01 | Elicitor-like protein                     | 5.1 | 0.65 | 2.9 | 7.5 | 4.5 |
| P3E02 | Nitrate-induced NOI protein               | 2.7 | 0.21 | 3.5 | 15  | 8   |
| P3E07 | En/Spm-like transposase                   | 27  | 3.33 | 1.7 | 4.4 | 3   |
| P3E08 | Unknown                                   | 67  | 0.17 | 26  | 123 | 44  |
| P3E09 | Mutator-like transposase                  | 2.8 | 0.02 | 0   | 6.5 | 4.5 |
| P3E04 | E6-like protein 1                         | 42  | 0.99 | 5.7 | 22  | 14  |
| P3E11 | Salicylic acid-induced fragment 1 protein | 3.1 | 1.5  | 3.8 | 15  | 9   |
| P3E12 | Acid phosphatase                          | 9.2 | 0.2  | 12  | 22  | 5.2 |
| P3F02 | (+)- $\delta$ -cadinene synthase          | 48  | 0.25 | 2.5 | 2.8 | 2.2 |
| P3F03 | 16S ribosomal RNA gene                    | 2.9 | 3.16 | 1.8 | 6.3 | 4   |
| P3F06 | Fibroblasts of periodontal ligament       | 3.6 | 0.04 | 46  | 171 | 92  |
| P3F07 | Mago Nashi-like protein                   | 2.2 | 0.75 | 4   | 20  | 11  |
| P3F10 | Arabidopsis PUR $\alpha$ -1 like protein  | 2.4 | 0.35 | 6.3 | 23  | 18  |
| P3F11 | Unknown                                   | 25  | 0.12 | 5.5 | 23  | 19  |
| P3F12 | Ripening-related protein                  | 2.8 | 1.27 | 2.9 | 4.9 | 2.3 |

|                                                                |                                         |     |      |      |      |     |
|----------------------------------------------------------------|-----------------------------------------|-----|------|------|------|-----|
| P3G05                                                          | Unknown                                 | ∞   | 0.02 | 42   | 260  | 160 |
| P3G09                                                          | Unknown                                 | 45  | 0.08 | 7    | 43   | 27  |
| P3H02                                                          | Unknown                                 | 188 | 0.04 | 26   | 288  | 210 |
| P3H03                                                          | Unknown                                 | 4.9 | 0.68 | 4.2  | 29   | 18  |
| P3H07                                                          | Unknown                                 | 13  | 0.04 | 27   | 35   | 14  |
| <b>Type III Expression reaching plateau around 10-20dpa</b>    |                                         |     |      |      |      |     |
| P1B09                                                          | Arabinogalactan protein 1               | 7.3 | 0.07 | 21   | 163  | 166 |
| P1C03                                                          | Extensin-like protein                   | 9.5 | 0.16 | 3.7  | 4.1  | 4.6 |
| P1E04                                                          | β-tubulin 9                             | 8.9 | 0.19 | 3.7  | 71   | 71  |
| P2C08                                                          | Unknown                                 | 3.7 | 0.03 | 29   | 174  | 179 |
| P2E04                                                          | Lipid transfer protein 10               | 6   | 0.15 | 9.2  | 29   | 32  |
| P2F09                                                          | Anther-specific proline-rich protein    | 2.8 | 0.22 | 2.2  | 3.6  | 4   |
| P2G06                                                          | Putative transmembrane transporter      | 137 | 0.12 | 13   | 29   | 32  |
| P3A02                                                          | Pyruvate kinase                         | 2.1 | 0.24 | 4.7  | 17   | 16  |
| P3E03                                                          | Unknown                                 | 14  | 0.18 | 2.6  | 8.4  | 8.7 |
| P3E05                                                          | E6-like protein 1                       | 3.7 | 0.1  | 19   | 54   | 55  |
| P3C01                                                          | Chalcone synthase                       | 3.8 | 0    | 0.02 | 12   | 12  |
| <b>Type IV With increasing expression levels even at 20dpa</b> |                                         |     |      |      |      |     |
| P1C09                                                          | Expansin 2                              | 94  | 0.08 | 13   | 17   | 30  |
| P1D02                                                          | Endo-xyloglucan transferase homolog     | 2   | 0.03 | 1    | 5.7  | 13  |
| P1D12                                                          | β-tubulin 8                             | 19  | 0.01 | 4    | 59   | 305 |
| P1E01                                                          | β-tubulin 5                             | 6.7 | 0.06 | 1.5  | 7.8  | 11  |
| P1E02                                                          | β-tubulin 4                             | 6.1 | 0.15 | 5.5  | 22   | 33  |
| P1E03                                                          | β-tubulin L                             | 11  | 0.22 | 4.1  | 46   | 58  |
| P1E05                                                          | Profilin                                | 41  | 0.01 | 21   | 26   | 67  |
| P1E06                                                          | α-subunit of F-actin capping protein    | 4.6 | 0.05 | 2.6  | 8.4  | 19  |
| P1E07                                                          | Kinesin-like calmodulin binding protein | 11  | 0.01 | 5    | 330  | 606 |
| P1E08                                                          | Kinesin heavy chain                     | 2.9 | 0.03 | 1    | 5.3  | 18  |
| P1F09                                                          | Methionine synthase                     | 2.6 | 0.03 | -1.5 | 6.7  | 9.3 |
| P1H02                                                          | Unknown                                 | 50  | 0.27 | 4.4  | 8.2  | 10  |
| P1H03                                                          | Putative RING zinc finger protein       | 56  | 0.02 | 20   | 53   | 73  |
| P2A05                                                          | Putative 40S ribosomal protein S17      | 2.6 | 0.27 | 4.3  | 7.5  | 11  |
| P2A08                                                          | Unknown                                 | 3.4 | 0    | 0    | 0.01 | 20  |
| P2A09                                                          | 60S ribosomal protein L17               | 2.1 | 0.37 | 2.5  | 3.7  | 4.6 |
| P2B07                                                          | Cysteine proteinase isoform III         | 3.3 | 0.39 | 5.2  | 9.9  | 14  |
| P2B08                                                          | Cysteine proteinase                     | 4.1 | 0.03 | 14   | 26   | 46  |
| P2D01                                                          | Putative serine carboxypeptidase        | 2.3 | 0.1  | 6.8  | 8    | 11  |
| P2F06                                                          | Fatty acid elongase                     | ∞   | 0    | 0.01 | 1    | 19  |
| P2F08                                                          | Lipase/hydrolase-like protein           | 17  | 0.01 | 14   | 8    | 36  |
| P2G05                                                          | Transmembrane transporter homolog       | 6.1 | 0.21 | 3.7  | 1.1  | 4.5 |
| P2G10                                                          | Unknown                                 | 28  | 0.16 | 2.2  | 11   | 16  |
| P2H01                                                          | Unknown                                 | 4   | 0.06 | 6.8  | 1.5  | 6.7 |
| P2H03                                                          | Unknown                                 | 3.6 | 0.01 | 9    | 7    | 19  |
| P2H04                                                          | Unknown                                 | ∞   | 0    | 0.07 | 2.1  | 12  |
| P2H06                                                          | β-galactosidase                         | 4.7 | 0.02 | 4    | 10   | 39  |
| P2H07                                                          | Unknown                                 | 3.1 | 0.08 | 2    | 3.8  | 5   |
| P3D05                                                          | WD-40 repeat protein homolog            | 2.3 | 0.11 | 3.5  | 11   | 14  |

|       |               |  |     |  |      |  |     |  |     |  |     |
|-------|---------------|--|-----|--|------|--|-----|--|-----|--|-----|
| P3F05 | FbLate-2 gene |  | 7.1 |  | 0.05 |  | 7.6 |  | 195 |  | 272 |
|-------|---------------|--|-----|--|------|--|-----|--|-----|--|-----|

<sup>a</sup> Differential expression ratio of 10 dpa fiber cDNA to that of 10 dpa *fl* mutant ovule.

<sup>b</sup> Values in red are the volume values acquired from the array analysis. If the value at 0 dpa is zero, the value at 5 dpa is shown, and so on. Other values in black represent the fold of increase or decrease (preceded with “-” signs) relative to values obtained at 0 dpa or at the earliest date that produced a positive volume value.

<sup>c</sup> LCFA, long-chain fatty acid.

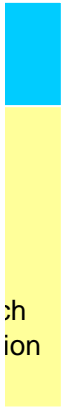

ch  
ion
